# Supplementary material for: Enriched CO2 and Root-Associated Fungi (Mycorrhizae) Yield Inverse Effects on Plant Mass and Root Morphology in Six Asclepias Species
Source: MDPI journal article supplement (doi:10.3390/plants10112474), 2021-11-16
Supplement: s1 [file s1]

## Supplementary Materials:

**Table S1.** Code of Isolates.

| <b>Mycorrhizal isolate</b>        | <b>Isolation year</b> | <b>Isolate ID</b> |
|-----------------------------------|-----------------------|-------------------|
| <i>Claroideoglomus claroideum</i> | 2014                  | 87-5C             |
| <i>Claroideoglomus lamellosum</i> | 2017                  | 57-4G             |
| <i>Glomus</i> species             | 2017                  | 69-6A             |
| <i>Racocetra fulgida</i>          | 2017                  | 57-4G             |

**Table S2.** Biomass explained by CO<sub>2</sub>, mycorrhizae, species, and growth chamber. Significant codes are for alpha thresholds.

### S2: Analysis of Variance (ANOVA)

#### Source of biomass variation

|                                              | Df  | Sum Sq  | Mean Sq | F value  | Pr(>F)    |     |
|----------------------------------------------|-----|---------|---------|----------|-----------|-----|
| CO <sub>2</sub>                              | 1   | 52.08   | 52.08   | 8.5256   | 0.00407   | **  |
| Mycorrhizae                                  | 1   | 1436.55 | 1436.55 | 235.1612 | < 2.2e-16 | *** |
| Species                                      | 5   | 547.96  | 109.59  | 17.9400  | 8.768e-14 | *** |
| Chamber                                      | 1   | 2.02    | 2.02    | 0.3302   | 0.56643   |     |
| CO <sub>2</sub> :Mycorrhizae                 | 1   | 34.76   | 34.76   | 5.6905   | 0.01837   | *   |
| CO <sub>2</sub> :Species                     | 5   | 77.62   | 15.52   | 2.5412   | 0.03091   | *   |
| Mycorrhizae:Species                          | 5   | 483.63  | 96.73   | 15.8339  | 2.146e-12 | *** |
| CO <sub>2</sub> :Chamber                     | 1   | 0.51    | 0.51    | 0.0834   | 0.77311   |     |
| Mycorrhizae:Chamber                          | 1   | 3.14    | 3.14    | 0.5142   | 0.47450   |     |
| Species:Chamber                              | 5   | 50.86   | 10.17   | 1.6652   | 0.14675   |     |
| CO <sub>2</sub> :Mycorrhizae:Species         | 5   | 60.78   | 12.16   | 1.9899   | 0.08361   | .   |
| CO <sub>2</sub> :Mycorrhizae:Chamber         | 1   | 0.01    | 0.01    | 0.0014   | 0.97003   |     |
| CO <sub>2</sub> :Species:Chamber             | 5   | 13.72   | 2.74    | 0.4492   | 0.81329   |     |
| Mycorrhizae:Species:Chamber                  | 5   | 62.58   | 12.52   | 2.0487   | 0.07535   | .   |
| CO <sub>2</sub> :Mycorrhizae:Species:Chamber | 5   | 11.95   | 2.39    | 0.3911   | 0.85427   |     |
| Residuals                                    | 143 | 873.56  | 6.11    |          |           |     |
| ---                                          |     |         |         |          |           |     |
| Signif. codes:                               | 0   | ****    | 0.001   | ***      | 0.01      | **  |
|                                              |     |         |         | 0.05     | .         | .   |
|                                              |     |         |         | 0.1      |           | 1   |

**Table S3.** Root morph. explained by CO2, mycorrhizae, species and growth chamber. Significant codes are for alpha thresholds

---

**S3: Analysis of Variance (ANOVA)**

---

**Source of relative transportive root variation**

---

|                                 | Df  | Sum Sq | Mean Sq | F value | Pr(>F)    |       |
|---------------------------------|-----|--------|---------|---------|-----------|-------|
| CO2                             | 1   | 56     | 55.5    | 0.2289  | 0.63305   |       |
| Mycorrhizae                     | 1   | 22277  | 22277.1 | 91.8808 | < 2.2e-16 | ***   |
| Species                         | 5   | 10834  | 2166.9  | 8.9373  | 2.083e-07 | ***   |
| Chamber                         | 1   | 286    | 285.8   | 1.1786  | 0.27947   |       |
| CO2:Mycorrhizae                 | 1   | 1111   | 1110.6  | 4.5807  | 0.03403   | *     |
| CO2:Species                     | 5   | 1187   | 237.4   | 0.9791  | 0.43275   |       |
| Mycorrhizae:Species             | 5   | 11550  | 2309.9  | 9.5271  | 7.317e-08 | ***   |
| CO2:Chamber                     | 1   | 75     | 74.9    | 0.3090  | 0.57919   |       |
| Mycorrhizae:Chamber             | 1   | 638    | 638.3   | 2.6328  | 0.10688   |       |
| Species:Chamber                 | 5   | 1275   | 255.0   | 1.0519  | 0.38978   |       |
| CO2:Mycorrhizae:Species         | 5   | 804    | 160.7   | 0.6629  | 0.65219   |       |
| CO2:Mycorrhizae:Chamber         | 1   | 108    | 108.5   | 0.4473  | 0.50469   |       |
| CO2:Species:Chamber             | 5   | 1613   | 322.6   | 1.3304  | 0.25465   |       |
| Mycorrhizae:Species:Chamber     | 5   | 304    | 60.8    | 0.2507  | 0.93889   |       |
| CO2:Mycorrhizae:Species:Chamber | 5   | 639    | 127.8   | 0.5273  | 0.75531   |       |
| Residuals                       | 143 | 34671  | 242.5   |         |           |       |
| ---                             |     |        |         |         |           |       |
| Signif. codes:                  | 0   | '***'  | 0.001   | '**'    | 0.01      | '*'   |
|                                 |     |        |         | 0.05    | '.'       | 0.1   |
|                                 |     |        |         |         |           | ' ' 1 |

---



---

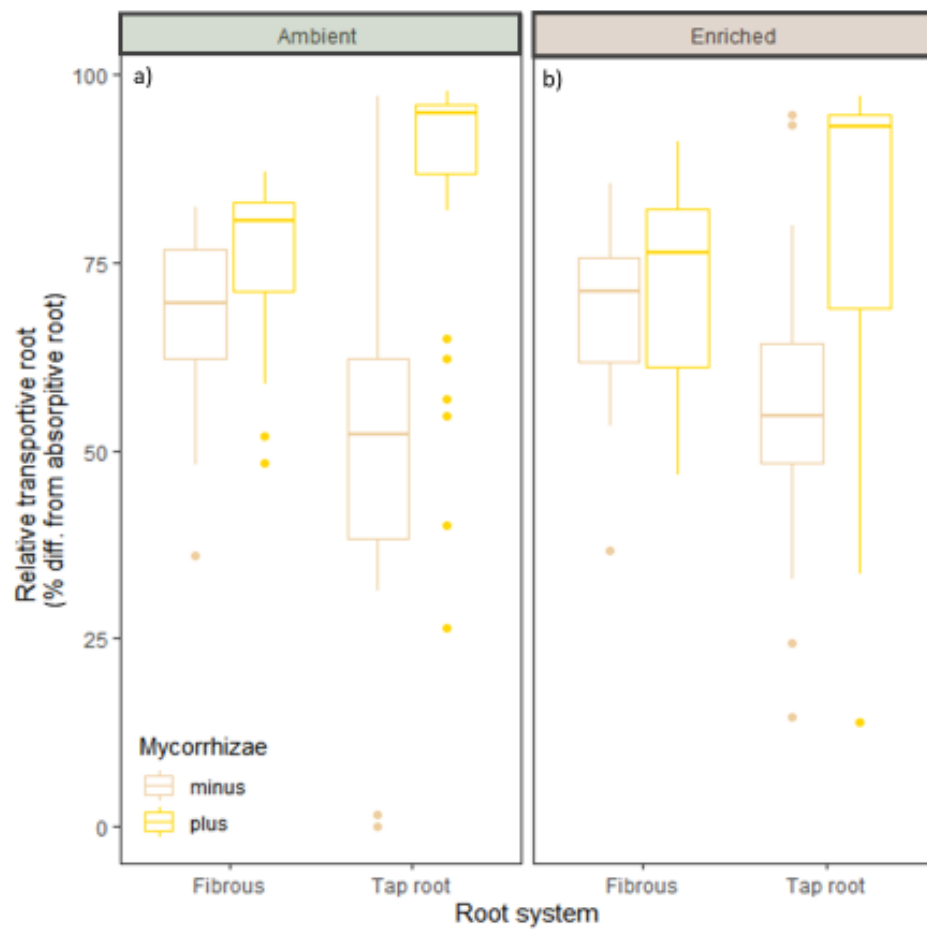

**Figure S1.** The effect of CO<sub>2</sub> and mycorrhizae on fibrous root systems. Irrespective of CO<sub>2</sub> regime, +mycorrhizae yielded a larger effect on tap-root systems.

**Table S4.** GenBank Accession table. Below Are the Corresponding Accessions Used to Construct the Phylogenetic Tree for the 6 *Asclepias* spp.

| <b><i>Asclepias rbcl</i> Accessions</b> |                                                                                                     |                                        |
|-----------------------------------------|-----------------------------------------------------------------------------------------------------|----------------------------------------|
| <i>A. incarnata</i>                     | [protein = ribulose-1,5-bisphosphate carboxylase/oxygenase large subunit] [protein_id = QBP44096.1] | Accession: MK525246.1<br>[gene = rbcl] |
| <i>A. sullivantii</i>                   | [protein = ribulose-1,5-bisphosphate carboxylase/oxygenase large subunit] [protein_id = QBP44100.1] | Accession: MK525250.1<br>[gene = rbcl] |
| <i>A. syriaca</i>                       | [protein = ribulose-1,5-bisphosphate carboxylase/oxygenase large subunit] [protein_id = AEH27042.1] | Accession: HQ384906.1<br>[gene = rbcl] |
| <i>A. tuberosa</i>                      | [protein = ribulose 1,5-bisphosphate carboxylase/oxygenase large subunit] [protein_id = QGV12460.1] | Accession: MN601492.1<br>[gene = rbcl] |
| <i>A. verticillata</i>                  | [protein = ribulose-1,5-bisphosphate carboxylase/oxygenase large subunit] [protein_id = AKG48691.1] | Accession: KJ773290.1<br>[gene = rbcl] |
| <i>A. viridis</i>                       | [protein = ribulose-1,5-bisphosphate carboxylase/oxygenase large subunit] [protein_id = QCW23980.1] | Accession: MH549741.1<br>[gene = rbcl] |
